# Supplementary material for: Intake of Coffee Associated With Decreased Depressive Symptoms Among Elderly Japanese Women: A Multi-Center Cross-Sectional Study
Source: PubMed Central journal article supplement (PMC7348072; doi:10.2188/jea.je20190010), 2020-08-05
Supplement: je-30-338-s001.pdf [file je-30-338-s001.pdf]

**eTable 1.** Characteristics of study participants according to coffee intake: elderly Japanese women (n=1,992) (Subgroup 1= non-coffee drinkers, n=491, 24.6%)

|                                             | Coffee intake           |                       |                       |                       | Trend <i>P</i> <sup>a</sup> |
|---------------------------------------------|-------------------------|-----------------------|-----------------------|-----------------------|-----------------------------|
|                                             | Subgroup 1<br>(n=491)   | Subgroup 2<br>(n=500) | Subgroup 3<br>(n=501) | Subgroup 4<br>(n=500) |                             |
| CES-D score                                 | 11.9 (7.5) <sup>b</sup> | 10.7 (6.3)            | 11.0 (6.3)            | 10.2 (6.5)            | 0.0004                      |
| Median intake, g/1,000 kcal                 | 0 (0–0) <sup>c</sup>    | 19 (3–57)             | 80 (58–106)           | 193 (107–619)         |                             |
| Age, years                                  | 76.4 (5.3)              | 74.8 (4.8)            | 74.4 (4.6)            | 73.0 (4.5)            | <0.0001                     |
| BMI, kg/m <sup>2</sup>                      | 22.4 (3.1)              | 23.1 (3.1)            | 22.9 (3.2)            | 22.6 (3.1)            | 0.38                        |
| Residential block, %                        |                         |                       |                       |                       |                             |
| Hokkaido and Tohoku                         | 10.6                    | 7.8                   | 11.2                  | 6.8                   | 0.008                       |
| Kanto                                       | 30.6                    | 31.6                  | 22.6                  | 16.0                  |                             |
| Hokuriku and Tokai                          | 21.6                    | 22.8                  | 24.2                  | 27.0                  |                             |
| Kinki                                       | 7.8                     | 11.2                  | 14.8                  | 16.8                  |                             |
| Chugoku and Shikoku                         | 10.0                    | 10.4                  | 17.8                  | 25.4                  |                             |
| Kyushu                                      | 19.6                    | 16.2                  | 9.6                   | 8.0                   |                             |
| Size of residential area, %                 |                         |                       |                       |                       |                             |
| City with a population ≥1 million           | 10.0                    | 14.0                  | 15.2                  | 12.8                  | 0.24                        |
| City with a population <1 million           | 78.6                    | 75.4                  | 73.3                  | 76.8                  |                             |
| Town and village                            | 11.4                    | 10.6                  | 11.6                  | 10.4                  |                             |
| Married, %                                  | 60.3                    | 58.4                  | 61.5                  | 63.2                  | 0.23                        |
| Living status (alone), %                    | 18.5                    | 14.4                  | 17.4                  | 15.0                  | 0.31                        |
| Physical activity, METs/day                 | 37.7 (6.5)              | 39.1 (6.3)            | 39.1 (6.2)            | 40.0 (6.4)            | <0.0001                     |
| Current smoking, %                          | 1.8                     | 2.0                   | 2.2                   | 3.8                   | 0.05                        |
| Current alcohol intake, %                   | 10.8                    | 19.0                  | 23.6                  | 24.0                  | <0.0001                     |
| Education, %                                |                         |                       |                       |                       |                             |
| Junior high school                          | 49.1                    | 49.0                  | 44.5                  | 41.6                  | 0.005                       |
| High school                                 | 44.0                    | 41.4                  | 45.3                  | 48.0                  |                             |
| Junior college                              | 5.7                     | 9.0                   | 8.8                   | 9.2                   |                             |
| University or higher                        | 1.2                     | 0.6                   | 1.4                   | 1.2                   |                             |
| Caffeine intake, mg/1,000 kcal <sup>d</sup> | 142.1 (80.6)            | 152.0 (76.6)          | 170.7 (69.3)          | 260.5 (95.5)          | <0.0001                     |
| EPA+DHA intake, mg/1,000 kcal               | 669.0 (390.3)           | 658.0 (330.9)         | 644.5 (353.7)         | 580.3 (303.7)         | <0.0001                     |
| Folate intake, µg/1,000 kcal                | 245.0 (82.3)            | 243.3 (70.6)          | 237.4 (68.4)          | 232.3 (71.9)          | 0.003                       |
| Dietary supplement use, %                   | 25.5                    | 30.4                  | 30.5                  | 34.0                  | 0.005                       |

BMI, body mass index; CES-D, Center for Epidemiologic Studies Depression Scale; DHA, docosahexaenoic acid; EPA, eicosapentaenoic acid; METs, metabolic equivalent hours.

Participants with depressive symptoms were defined as a CES-D score ≥16.

<sup>a</sup>Trend *P* values were based on linear regression analysis for continuous variables with ordinal numbers 0–3 assigned to green tea and coffee intake categories, or Mantel-Haenszel chi-square test for categorical variables.

<sup>b</sup>Values for continuous variables are in mean ± standard deviation (all such values).

<sup>c</sup>Range.

<sup>d</sup>Calculated from green tea, black tea and Chinese tea, coffee, and cola.

**eTable 2.** Adjusted odds ratio (95% CI) of depressive symptoms according to intake of coffee in elderly Japanese women (n=1,992)  
(Subgroup 1 = non-coffee drinkers, n=491, 24.6%)

|                                  | Coffee intake         |                       |                       |                       | Trend <i>P</i> <sup>a</sup> |
|----------------------------------|-----------------------|-----------------------|-----------------------|-----------------------|-----------------------------|
|                                  | Subgroup 1<br>(n=491) | Subgroup 2<br>(n=500) | Subgroup 3<br>(n=501) | Subgroup 4<br>(n=500) |                             |
| Median intake, g/1,000 kcal      | 0 (0–0)               | 19 (3–57)             | 80 (58–106)           | 193 (107–619)         |                             |
| Depressive symptoms, %           | 28.7                  | 20.2                  | 21.0                  | 18.4                  |                             |
| Crude OR (95% CI)                | 1.00 (Reference)      | 0.63 (0.47-0.84)      | 0.66 (0.49-0.88)      | 0.56 (0.42-0.76)      | 0.0003                      |
| Age adjusted OR (95% CI)         | 1.00 (Reference)      | 0.67 (0.50-0.90)      | 0.71 (0.53-0.96)      | 0.64 (0.47-0.87)      | 0.008                       |
| Model 1 <sup>b</sup> OR (95% CI) | 1.00 (Reference)      | 0.68 (0.50-0.92)      | 0.73 (0.54-0.99)      | 0.66 (0.48-0.91)      | 0.02                        |
| Model 2 <sup>c</sup> OR (95% CI) | 1.00 (Reference)      | 0.70 (0.52-0.95)      | 0.75 (0.55-1.02)      | 0.65 (0.47-0.89)      | 0.01                        |
| Model 3 <sup>d</sup> OR (95% CI) | 1.00 (Reference)      | 0.70 (0.52-0.95)      | 0.73 (0.54-1.00)      | 0.64 (0.46-0.88)      | 0.01                        |

BMI, body mass index; CES-D, Center for Epidemiologic Studies Depression Scale; CI, confidence interval; DHA, docosahexaenoic acid; EPA, eicosapentaenoic acid; METs, metabolic equivalent hours; OR, odds ratio.

Participants with depressive symptoms were defined as a CES-D score  $\geq 16$ .

Green tea, coffee intake, EPA + DHA intake and folate intake were energy-adjusted according to the density method.

<sup>a</sup>Trend *P* values were based on linear regression analysis for continuous variables with ordinal numbers 0–3 assigned to green tea or coffee intake categories.

<sup>b</sup>Model 1: adjusted for age (y, continuous) and residential block (Hokkaido and Tohoku, Kanto, Hokuriku and Tokai, Kinki, Chugoku and Shikoku, and Kyushu), living status (alone or not alone), current smoking (yes or no), alcohol drinking (yes or no), marital status (married or unmarried), physical activity level (total metabolic equivalents hours/day: METs, continuous), size of residential area (city with a population  $\geq 1$  million, city with a population  $< 1$  million, and town and village), BMI (kg/m<sup>2</sup>, continuous) and education (junior high school, high school junior college, and university and higher).

<sup>c</sup>Model 2: adjusted for variables in model 1 with EPA + DHA intake (mg/1,000 kcal, continuous), folate intake ( $\mu$ g/1,000 kcal, continuous), dietary supplement use (yes or no).

<sup>d</sup>Model 3: adjusted for variables in model 2 with mutually adjusted for green tea intake (g/1,000 kcal) or coffee intake (g/1,000 kcal).
